# Supplementary material
Source: PubMed Central journal article supplement (PMC4336307)
Supplement: 11302_2014_9431_MOESM1_ESM.pdf [file 11302_2014_9431_MOESM1_ESM.pdf]

**Fig S1. Synteny conservation of the *intestinal alkaline phosphatase (ALPI)* family genes in vertebrate genomes.**

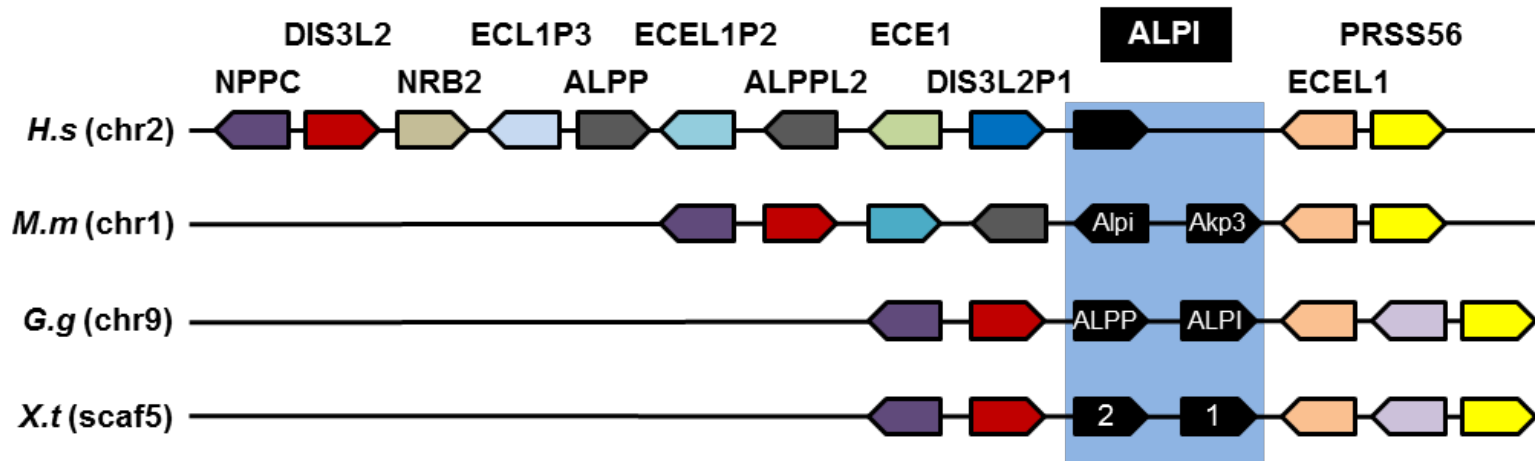

Tocco A.<sup>1,2</sup>, Pinson B.<sup>3,4</sup>, Thiébaud P.<sup>1,2</sup>, Thézé N.<sup>1,2</sup>, Massé K.<sup>1,2,\*</sup>. **Comparative genomic and expression analysis of the adenosine signalling pathway members in *Xenopus*.** Purinergic Signalling (2014)

<sup>1</sup>University of Bordeaux, CIRID UMR 5164, F-33000, Bordeaux, France.

<sup>2</sup>CNRS, CIRID, UMR 5164, F-33000 Bordeaux, France

<sup>3</sup>Université de Bordeaux, IBGC UMR 5095 1, F-33077 Bordeaux, France

<sup>4</sup> CNRS, IBGC UMR 5095 1, F-33077 Bordeaux, France

\* corresponding author [karine.masse@u-bordeaux.fr](mailto:karine.masse@u-bordeaux.fr)

**Fig S2. Relatedness of the acid phosphatase (ACP) proteins.**

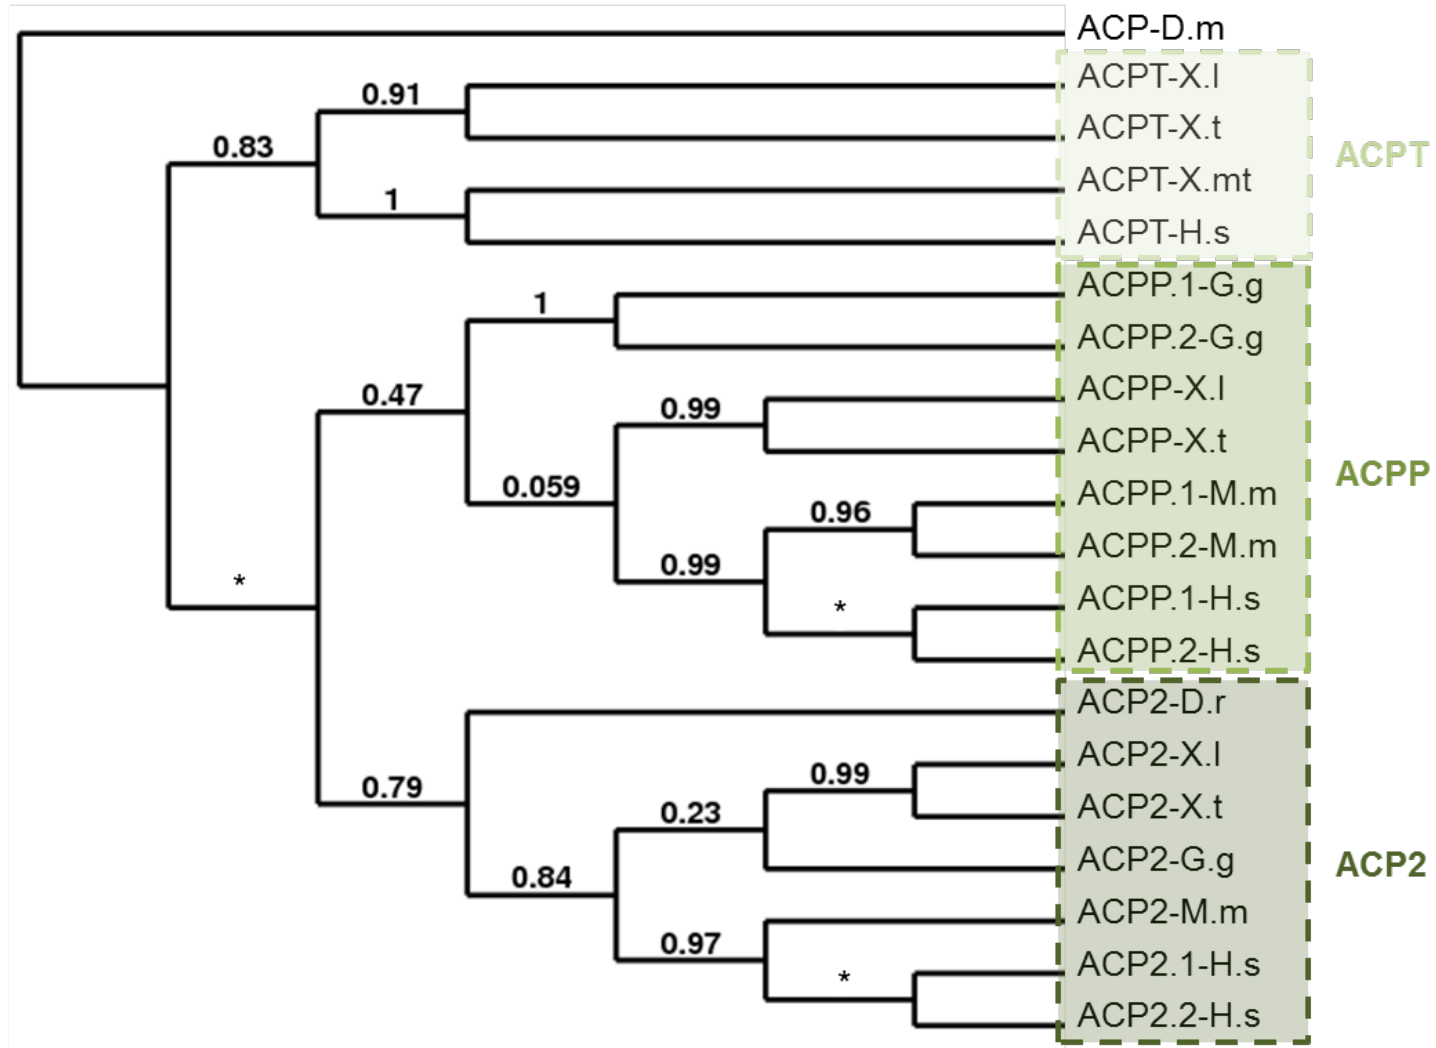

Tocco A.<sup>1,2</sup>, Pinson B.<sup>3,4</sup> Thiébaud P.<sup>1,2</sup>, Thézé N.<sup>1,2</sup>, Massé K.<sup>1,2,\*</sup>. Comparative genomic and expression analysis of the adenosine signalling pathway members in *Xenopus*. Purinergic Signalling (2014)

<sup>1</sup>University of Bordeaux, CIRID UMR 5164, F-33000, Bordeaux, France.

<sup>2</sup>CNRS, CIRID, UMR 5164, F-33000 Bordeaux, France

<sup>3</sup> Université de Bordeaux, IBGC UMR 5095 1, F-33077 Bordeaux, France

<sup>4</sup> CNRS, IBGC UMR 5095 1, F-33077 Bordeaux, France

\* corresponding author [karine.masse@u-bordeaux.fr](mailto:karine.masse@u-bordeaux.fr)

**Fig S3. Conservative evolution of the *adenosine deaminase (ADA)* genes.**

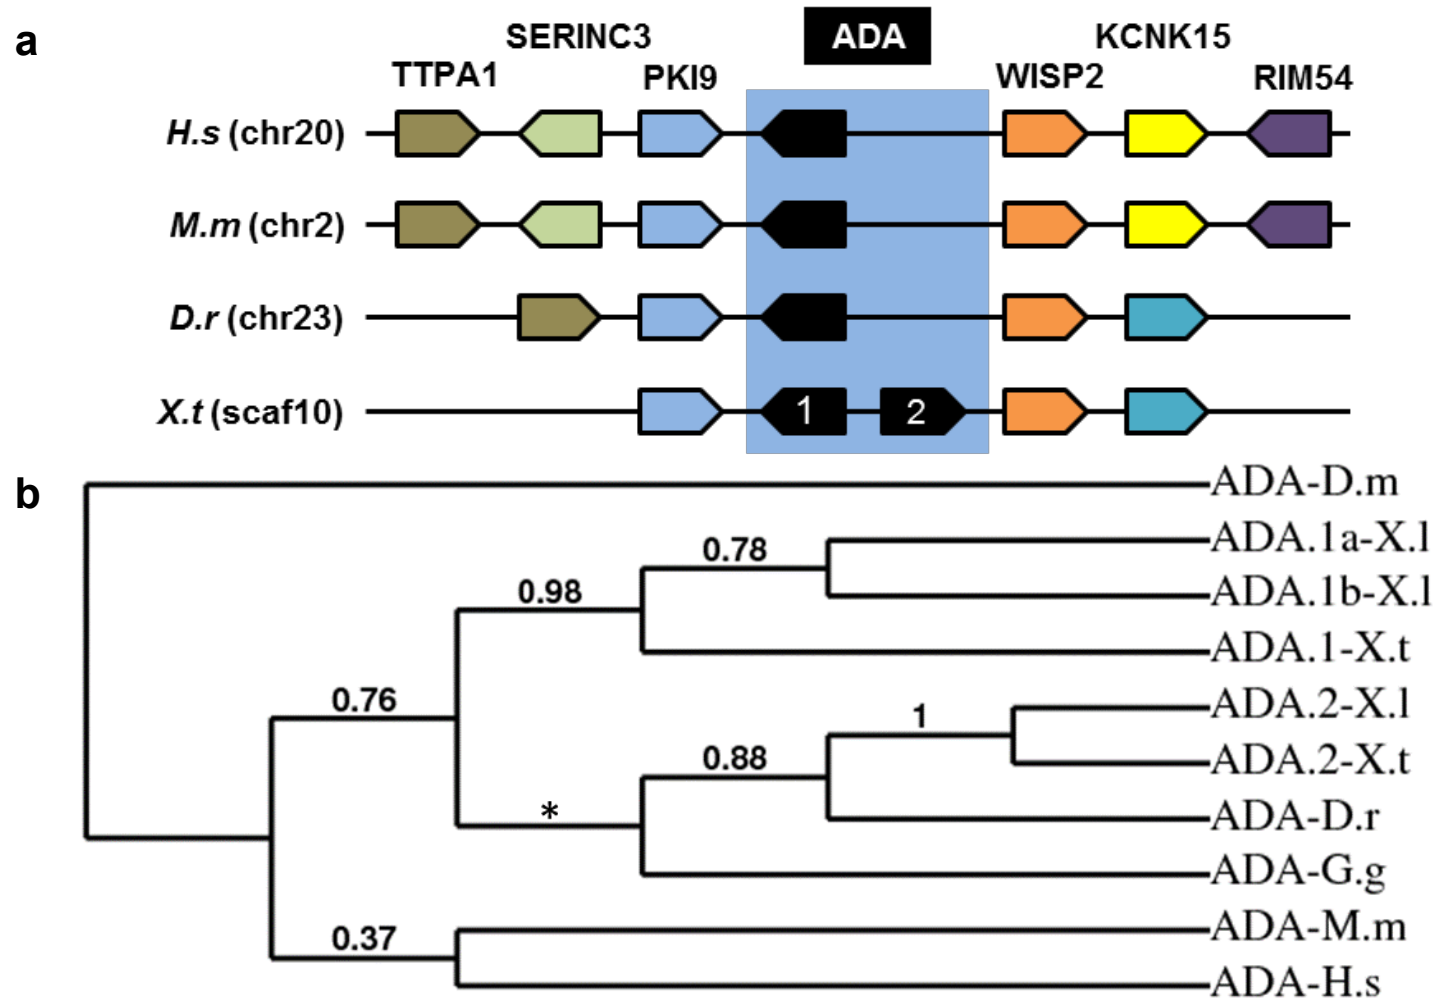

Tocco A.<sup>1,2</sup>, Pinson B.<sup>3,4</sup>, Thiébaud P.<sup>1,2</sup>, Thézé N.<sup>1,2</sup>, Massé K.<sup>1,2,\*</sup>. **Comparative genomic and expression analysis of the adenosine signalling pathway members in *Xenopus*.** Purinergic Signalling (2014)

<sup>1</sup>University of Bordeaux, CIRID UMR 5164, F-33000, Bordeaux, France.

<sup>2</sup>CNRS, CIRID, UMR 5164, F-33000 Bordeaux, France

<sup>3</sup>Université de Bordeaux, IBGC UMR 5095 1, F-33077 Bordeaux, France

<sup>4</sup> CNRS, IBGC UMR 5095 1, F-33077 Bordeaux, France

\* corresponding author [karine.masse@u-bordeaux.fr](mailto:karine.masse@u-bordeaux.fr)

## Fig S4a. Conservative evolution of *purine nucleoside phosphorylase (PNP)* genes.

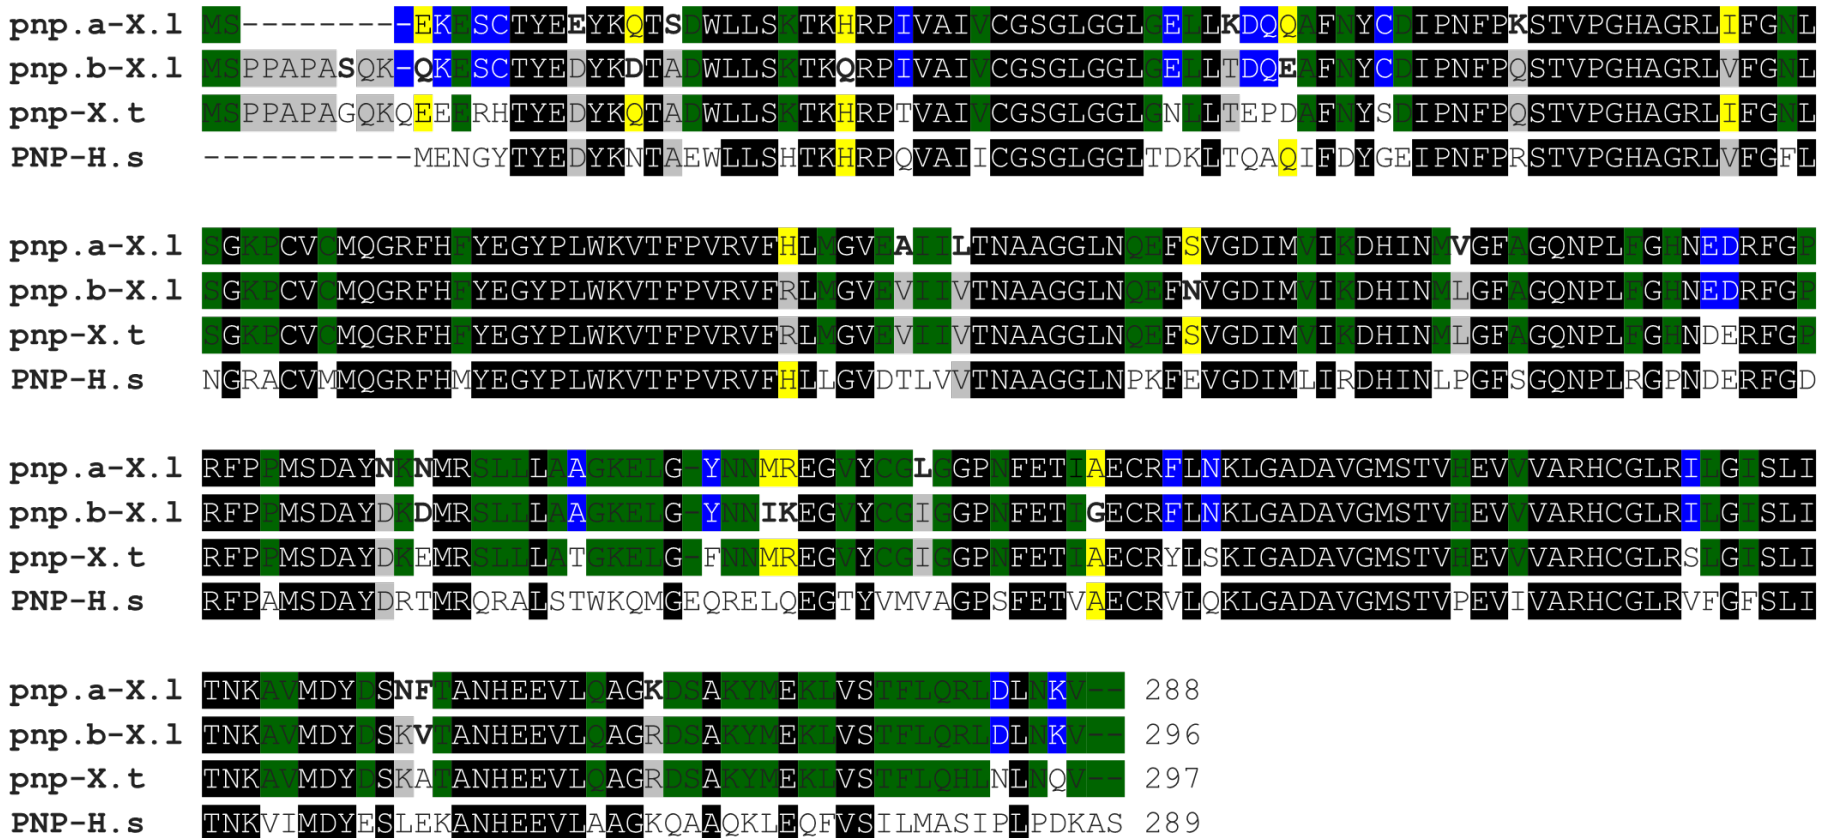

Tocco A.<sup>1,2</sup>, Pinson B.<sup>3,4</sup> Thiébaud P.<sup>1,2</sup>, Thézé N.<sup>1,2</sup>, Massé K.<sup>1,2,\*</sup>. **Comparative genomic and expression analysis of the adenosine signalling pathway members in *Xenopus*.**

Purinergic Signalling (2014)

<sup>1</sup>University of Bordeaux, CIRID UMR 5164, F-33000, Bordeaux, France.

<sup>2</sup>CNRS, CIRID, UMR 5164, F-33000 Bordeaux, France

<sup>3</sup>Université de Bordeaux, IBGC UMR 5095 1, F-33077 Bordeaux, France

<sup>4</sup>CNRS, IBGC UMR 5095 1, F-33077 Bordeaux, France

\* corresponding author [karine.masse@u-bordeaux.fr](mailto:karine.masse@u-bordeaux.fr)

**Fig S4b. Conservative evolution of *purine nucleoside phosphorylase (PNP)* genes.**

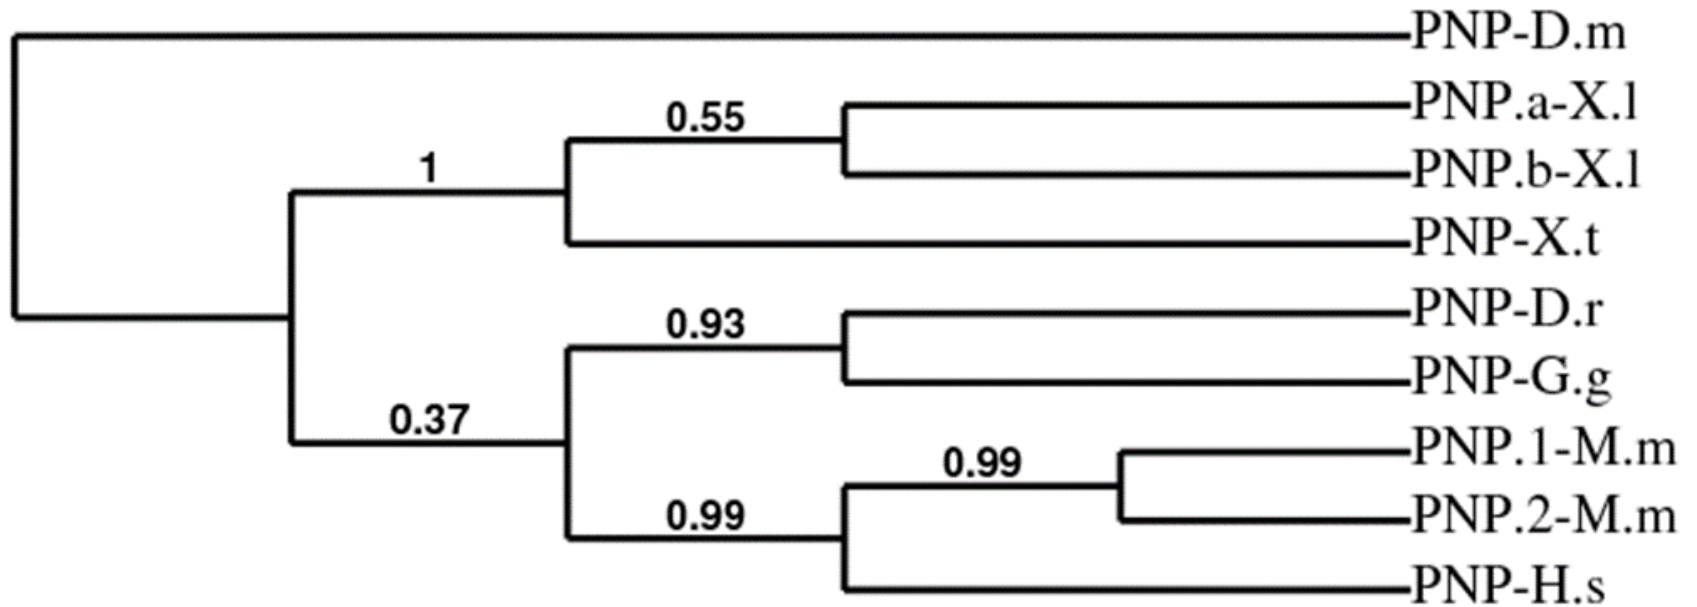

Tocco A.<sup>1,2</sup>, Pinson B.<sup>3,4</sup> Thiébaud P.<sup>1,2</sup>, Thézé N.<sup>1,2</sup>, Massé K.<sup>1,2,\*</sup>. **Comparative genomic and expression analysis of the adenosine signalling pathway members in *Xenopus*.** Purinergic Signalling (2014)

<sup>1</sup>University of Bordeaux, CIRID UMR 5164, F-33000, Bordeaux, France.

<sup>2</sup>CNRS, CIRID, UMR 5164, F-33000 Bordeaux, France

<sup>3</sup> Université de Bordeaux, IBGC UMR 5095 1, F-33077 Bordeaux, France

<sup>4</sup> CNRS, IBGC UMR 5095 1, F-33077 Bordeaux, France

\* corresponding author [karine.masse@u-bordeaux.fr](mailto:karine.masse@u-bordeaux.fr)

**Fig S5a. Conservative evolution of the *equilibrative nucleoside transporter* (*SLC29A*) genes.**

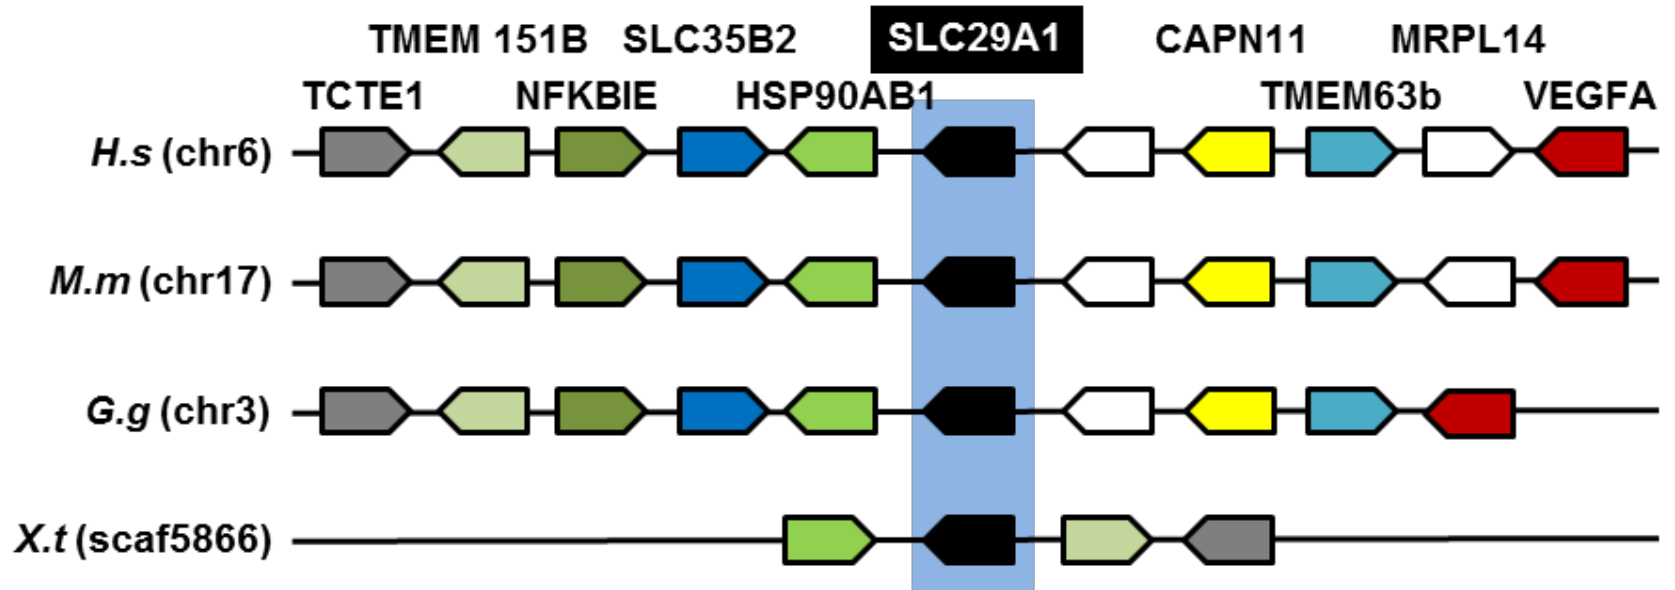

Tocco A.<sup>1,2</sup>, Pinson B.<sup>3,4</sup> Thiébaud P.<sup>1,2</sup>, Thézé N.<sup>1,2</sup>, Massé K.<sup>1,2,\*</sup>. **Comparative genomic and expression analysis of the adenosine signalling pathway members in *Xenopus*.** Purinergic Signalling (2014)

<sup>1</sup>University of Bordeaux, CIRID UMR 5164, F-33000, Bordeaux, France.

<sup>2</sup>CNRS, CIRID, UMR 5164, F-33000 Bordeaux, France

<sup>3</sup> Université de Bordeaux, IBGC UMR 5095 1, F-33077 Bordeaux, France

<sup>4</sup> CNRS, IBGC UMR 5095 1, F-33077 Bordeaux, France

\* corresponding author [karine.masse@u-bordeaux.fr](mailto:karine.masse@u-bordeaux.fr)

**Fig S5b. Conservative evolution of the *equilibrative nucleoside transporter* (*SLC29A*) genes.**

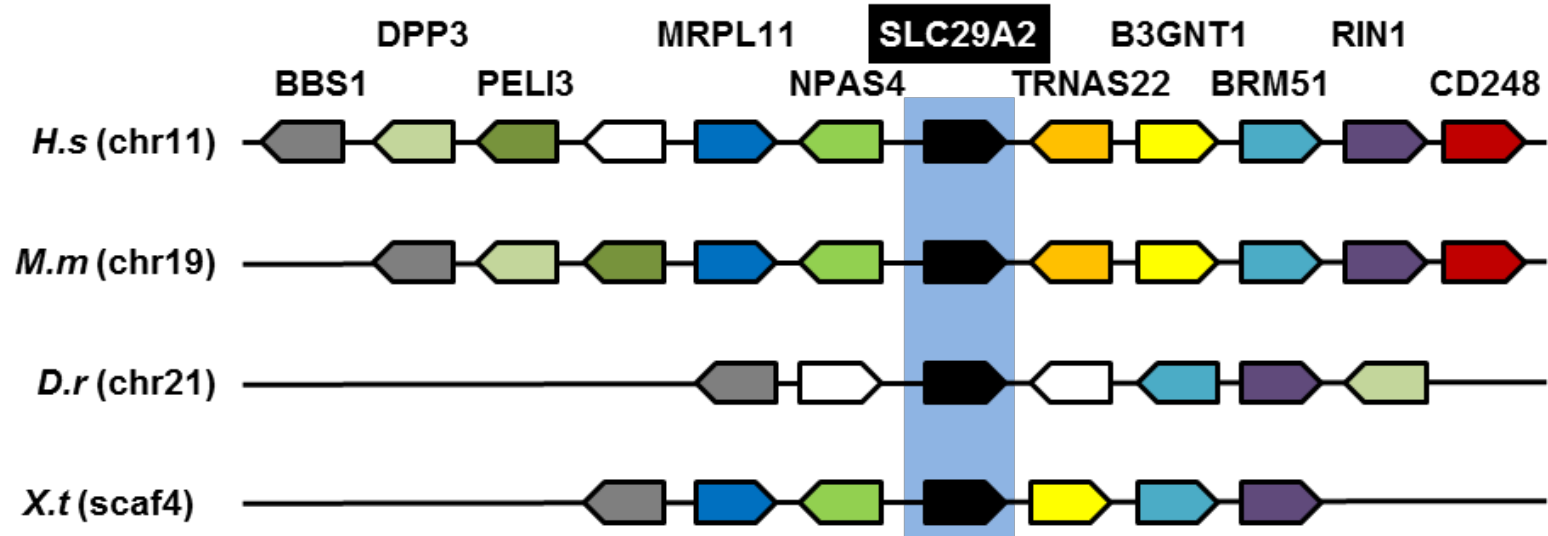

Tocco A.<sup>1,2</sup>, Pinson B.<sup>3,4</sup> Thiébaud P.<sup>1,2</sup>, Thézé N.<sup>1,2</sup>, Massé K.<sup>1,2,\*</sup>. **Comparative genomic and expression analysis of the adenosine signalling pathway members in *Xenopus*.** Purinergic Signalling (2014)

<sup>1</sup>University of Bordeaux, CIRID UMR 5164, F-33000, Bordeaux, France.

<sup>2</sup>CNRS, CIRID, UMR 5164, F-33000 Bordeaux, France

<sup>3</sup> Université de Bordeaux, IBGC UMR 5095 1, F-33077 Bordeaux, France

<sup>4</sup> CNRS, IBGC UMR 5095 1, F-33077 Bordeaux, France

\* corresponding author [karine.masse@u-bordeaux.fr](mailto:karine.masse@u-bordeaux.fr)

**Fig S5c. Conservative evolution of the *equilibrative nucleoside transporter* (*SLC29A*) genes.**

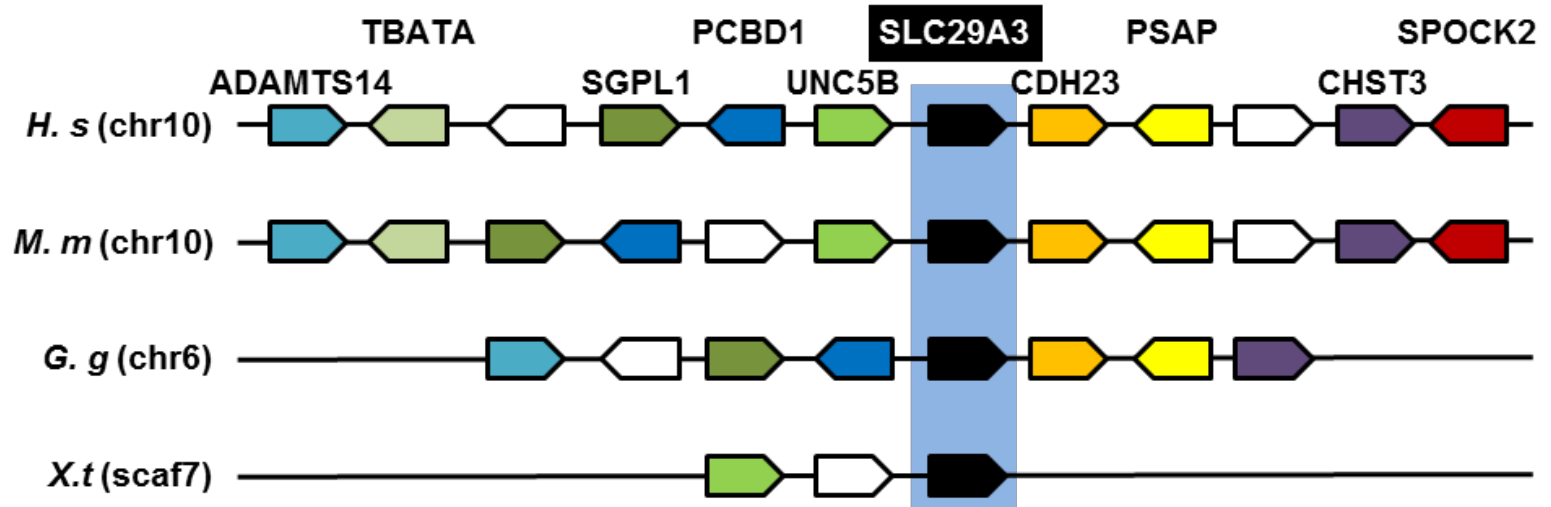

Tocco A.<sup>1,2</sup>, Pinson B.<sup>3,4</sup>, Thiébaud P.<sup>1,2</sup>, Thézé N.<sup>1,2</sup>, Massé K.<sup>1,2,\*</sup>. **Comparative genomic and expression analysis of the adenosine signalling pathway members in *Xenopus*.** Purinergic Signalling (2014)

<sup>1</sup>University of Bordeaux, CIRID UMR 5164, F-33000, Bordeaux, France.

<sup>2</sup>CNRS, CIRID, UMR 5164, F-33000 Bordeaux, France

<sup>3</sup>Université de Bordeaux, IBGC UMR 5095 1, F-33077 Bordeaux, France

<sup>4</sup> CNRS, IBGC UMR 5095 1, F-33077 Bordeaux, France

\* corresponding author [karine.masse@u-bordeaux.fr](mailto:karine.masse@u-bordeaux.fr)



**Fig S6a. Conservative evolution of the *concentrative nucleoside transporter (SLC28A)* genes.**

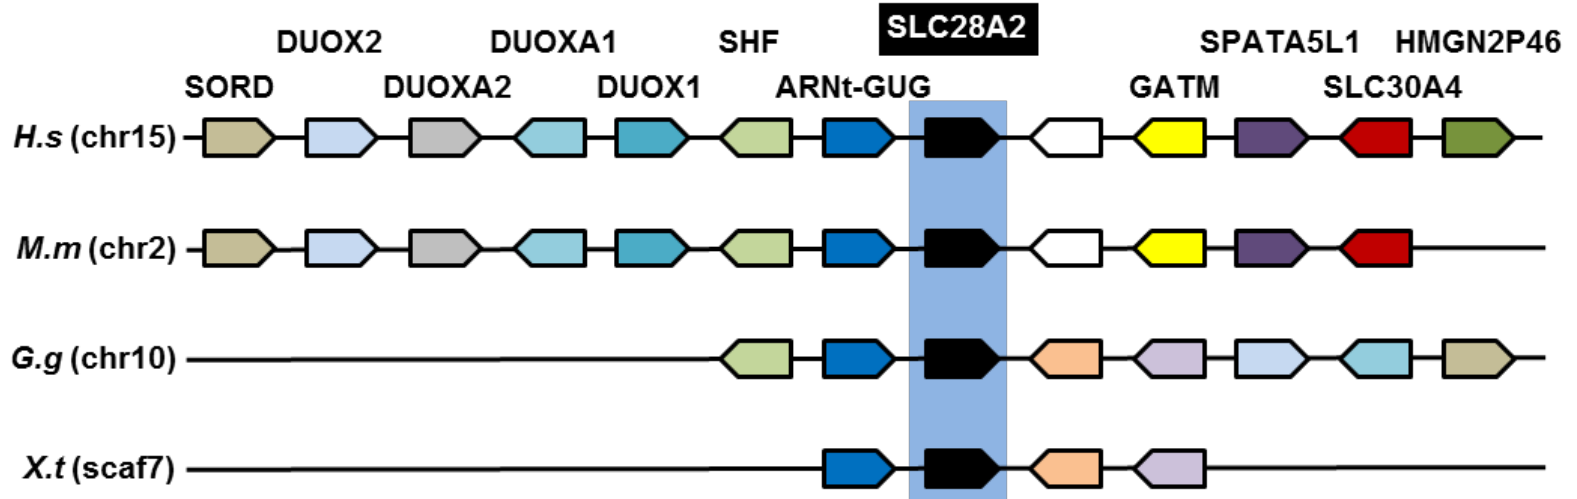

Tocco A.<sup>1,2</sup>, Pinson B.<sup>3,4</sup> Thiébaud P.<sup>1,2</sup>, Thézé N.<sup>1,2</sup>, Massé K.<sup>1,2,\*</sup>. **Comparative genomic and expression analysis of the adenosine signalling pathway members in *Xenopus*.** Purinergic Signalling (2014)

<sup>1</sup>University of Bordeaux, CIRID UMR 5164, F-33000, Bordeaux, France.

<sup>2</sup>CNRS, CIRID, UMR 5164, F-33000 Bordeaux, France

<sup>3</sup> Université de Bordeaux, IBGC UMR 5095 1, F-33077 Bordeaux, France

<sup>4</sup> CNRS, IBGC UMR 5095 1, F-33077 Bordeaux, France

\* corresponding author [karine.masse@u-bordeaux.fr](mailto:karine.masse@u-bordeaux.fr)

**Fig S6b. Conservative evolution of the *concentrative nucleoside transporter* (*SLC28A*) genes.**

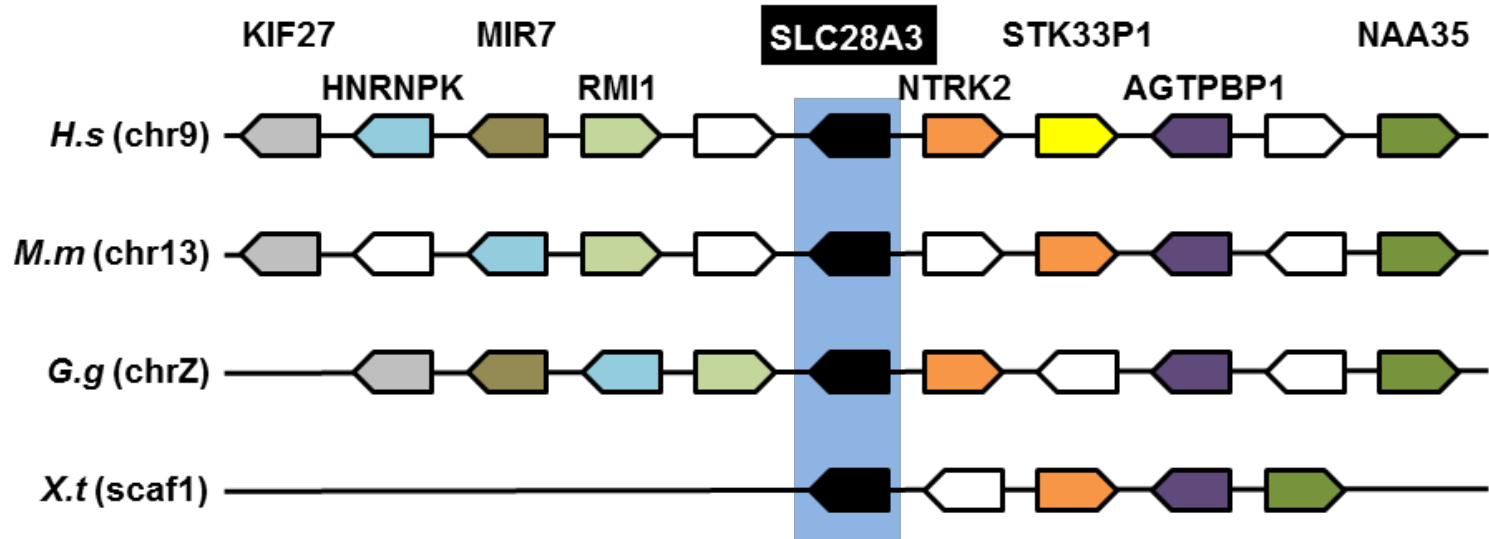

Tocco A.<sup>1,2</sup>, Pinson B.<sup>3,4</sup> Thiébaud P.<sup>1,2</sup>, Thézé N.<sup>1,2</sup>, Massé K.<sup>1,2,\*</sup>. **Comparative genomic and expression analysis of the adenosine signalling pathway members in *Xenopus*.** Purinergic Signalling (2014)

<sup>1</sup>University of Bordeaux, CIRID UMR 5164, F-33000, Bordeaux, France.

<sup>2</sup>CNRS, CIRID, UMR 5164, F-33000 Bordeaux, France

<sup>3</sup> Université de Bordeaux, IBGC UMR 5095 1, F-33077 Bordeaux, France

<sup>4</sup> CNRS, IBGC UMR 5095 1, F-33077 Bordeaux, France

\* corresponding author [karine.masse@u-bordeaux.fr](mailto:karine.masse@u-bordeaux.fr)

**Table S1. Accession numbers of the different adenosine members clones used in this study.**

| Name            |              | <i>X.laevis</i> |           |              |              | <i>X.tropicalis</i> |              |              |
|-----------------|--------------|-----------------|-----------|--------------|--------------|---------------------|--------------|--------------|
| Gene            | Protein      | Homeologue      | GeneID    | DNA          | Protein      | Gene ID             | DNA          | Protein      |
| <i>nt5e</i>     | <i>cd73</i>  | N.d.            | 734513    | NM_001095994 | NP_001089463 | 100489347           | XM_002933927 | XP_002933973 |
| <i>alpl</i>     | <i>tnap</i>  | N.d.            | 380589    | NM_001087426 | NP_001080895 | 100485467           | XM_002943439 | XP_002943485 |
| <i>alpi.1</i>   | <i>iap.1</i> | N.d.            | 100036885 | NM_001097666 | NP_001091135 | 548375              | XM_002937341 | XP_002937387 |
| <i>alpi.2</i>   | <i>iap.2</i> | N.d.            | 100127270 | NM_001112847 | NP_001106318 | 100144722           | NM_001123474 | NP_001116946 |
| <i>acpt</i>     | <i>tacp</i>  | N.d.            | 446918    | NM_001093611 | NP_001087080 | 100494856           | XM_002934647 | XP_002934693 |
| <i>acpp</i>     | <i>pacp</i>  | N.d.            | N.d.      | This work    | This work    | 101735257           | XM_004915370 | XP_004915427 |
| <i>adora1</i>   | <i>a1</i>    | <i>a</i>        | 378623    | NM_001085844 | NP_001079313 | 100127730           | NM_001113069 | NP_001106540 |
|                 |              | <i>b</i>        | N.d.      | This work    | This work    |                     |              |              |
| <i>adora2a</i>  | <i>a2a</i>   | <i>a</i>        | 495175    | NM_001094867 | NP_001088336 | 100127551           | XM_002938923 | NP_001106398 |
|                 |              | <i>b</i>        | N.d.      | This work    | This work    |                     |              |              |
| <i>adora2b</i>  | <i>a2b</i>   | <i>a</i>        | N.d.      | This work    | This work    | 100496230           | XM_002938923 | XP_002938969 |
|                 |              | <i>b</i>        | N.d.      | This work    | This work    |                     |              |              |
| <i>adora3.1</i> | <i>a3.1</i>  | N.d.            | N.d.      | This work    | This work    | 100496142           | XM_002932802 | XP_002932848 |
| <i>adora3.2</i> | <i>a3.2</i>  | N.d.            | N.d.      | This work    | This work    | 100496301           | XM_002932803 | XP_002932849 |
| <i>adora3.3</i> | <i>a3.3</i>  | N.d.            | N.d.      | This work    | This work    | 101734629           | XM_004910728 | XP_004910785 |
| <i>adk</i>      | <i>adk</i>   | N.d.            | 444786    | NM_001092888 | NP_001086357 | 549452              | NM_001016698 | NP_001016698 |
| <i>ada.1</i>    | <i>ada.1</i> | <i>a</i>        | 444167    | NM_001092271 | NP_001085740 | 496434              | NM_001011025 | NP_001011025 |
|                 |              | <i>b</i>        | N.d.      | This work    | This work    |                     |              |              |
| <i>ada.2</i>    | <i>ada.2</i> | N.d.            | 447564    | NM_001094271 | NP_001087740 | 100135194           | NM_001113897 | NP_001107369 |
| <i>pnp</i>      | <i>pnp</i>   | <i>a</i>        | 379499    | NM_001086340 | NP_001079809 | 448370              | NM_001006719 | NP_001006720 |
|                 |              | <i>b</i>        | N.d.      | BC047264     | This work    |                     |              |              |
| <i>slc29a1</i>  | <i>ent1</i>  | <i>a</i>        | 496024    | NM_001095291 | NP_001088760 | 548435              | NM_001015718 | NP_001015718 |
|                 |              | <i>b</i>        | 398868    | NM_001089858 | NP_001083327 |                     |              |              |
| <i>slc29a2</i>  | <i>ent2</i>  | N.d.            | 444417    | NM_001092519 | NP_001085988 | 548864              | NM_001016110 | NP_001016110 |
| <i>slc29a3</i>  | <i>ent3</i>  | <i>a</i>        | 445860    | BC077451     | AAH77451     | 100037858           | NM_001097303 | NP_001090772 |
|                 |              | <i>b</i>        | N.d.      | This work    | This work    |                     |              |              |
| <i>slc28a2</i>  | <i>cnt2</i>  | N.d.            | 446617    | NM_001093313 | NP_001086782 | 100496776           | XM_002934569 | XP_002934615 |
| <i>slc28a3</i>  | <i>cnt3</i>  | N.d.            | N.d.      | This work    | This work    | 100492606           | XM_002934977 | XP_002935023 |

N.d.: not determined

Tocco A.<sup>1,2</sup>, Pinson B.<sup>3,4</sup> Thiébaud P.<sup>1,2</sup>, Thézé N.<sup>1,2</sup>, Massé K.<sup>1,2,\*</sup>. **Comparative genomic and expression analysis of the adenosine signalling pathway members in *Xenopus*.**

Purinergic Signalling (2014)

<sup>1</sup>University of Bordeaux, CIRID UMR 5164, F-33000, Bordeaux, France.<sup>2</sup>CNRS, CIRID, UMR 5164, F-33000 Bordeaux, France<sup>3</sup> Université de Bordeaux, IBGC UMR 5095 1, F-33077 Bordeaux, France<sup>4</sup> CNRS, IBGC UMR 5095 1, F-33077 Bordeaux, France\* corresponding author [karine.masse@u-bordeaux.fr](mailto:karine.masse@u-bordeaux.fr)

**Table S2. Primer sequences and PCR conditions for the required markers**

|                  | Primers (5'-3')                                          | cDNA size (bp)    | Genomic DNA size (bp)    | Cycle s | Anneling temperature (°C) | References                  |
|------------------|----------------------------------------------------------|-------------------|--------------------------|---------|---------------------------|-----------------------------|
| <i>cd73</i>      | U-GGCGTGAAGCTGCTTAT<br>D-CAGTGCCCAACCTGTAGT              | 212               | 22 034                   | 31      | 55                        | This work                   |
| <i>alpl</i>      | U-TTGCCCACTAGCCCAAGCCC<br>D-GAGGGTCCCCAGCAGGAGCA         | 169               | 10 750                   | 29      | 61                        | This work                   |
| <i>alpi.1</i>    | U-TCTCCTCCGCAACACATGT<br>D-GGTCAGTTCTGTTGAACC            | 435               | 4 304                    | 27      | 61                        | This work                   |
| <i>alpi.2</i>    | U-CTATCCTCTCCCCGATGT<br>D-CTGGATTTCCTCTGCATC             | 523               | 1 843                    | 31      | 56                        | This work                   |
| <i>acpt</i>      | U-ACAGCACCCCTCATAGCGTTA<br>D-AGACAGAACAGCATCACGGT        | 354               | 1 828                    | 31      | 61                        | This work                   |
| <i>adora1</i>    | U-GCCTTGGTCATCCCACTCGCC<br>D-GGACAGCACCAACATCCCGT        | 228 (a) / 232 (b) | 24 478 (a) / 26 527 (b)  | 30      | 59                        | This work                   |
| <i>adora2a</i>   | U-ATTGCAATTAGTACCGATTTTGT<br>D-TTCTCCACATGTCACTTTTCATTTT | 456 (a) / 453 (b) | 4 970 (a) / 4 422 (b)    | 32      | 59                        | This work                   |
| <i>adora2b</i>   | U-GGCCGTGGCCATTGACAGGTA<br>D-AGCTGCTTACGGGCAACCATGA      | 327 (a) / ? (b)   | 48 274 (a) / >38 546 (b) | 30      | 61                        | This work                   |
| <i>adora 3.1</i> | U-GGGTAATGAGACAGCCGAA<br>D-CCTGCAGAAGATCCTGGTTG          | 355               | 5 829                    | 33      | 60                        | This work                   |
| <i>adora3.3</i>  | U-GATGAAGATTTTCATCTACA<br>D-CTCCTCACGTTTTTTGAATT         | 321               | 11 427                   | 34      | 55                        | This work                   |
| <i>adk</i>       | U-CGGGGTTCTTCTCAGTC<br>D-ACGTAGCAGCTTCCGTTTCA            | 186               | 15 826                   | 24      | 63                        | This work                   |
| <i>ada.1</i>     | U-CAAACCTCCCGCAGACACGGT<br>D-GTGCCCGGGGTACGACTCAC        | 481 (a) / 481 (b) | 6438 (a) / 8546 (b)      | 30      | 61                        | This work                   |
| <i>ada.2</i>     | U-GTTGAGACGGAAGCCAAACAAG<br>D-TCTTTGACCACTGAAGTGGCC      | 416               | > 3000                   | 31      | 61                        | This work                   |
| <i>pnp</i>       | U-TAGCTGCTGGCAAGGAGCTGGGT<br>D-TGTTGCCAACCCGCAGCTGTTCT   | 503 (a) / 510 (b) | 1574 (a) / 2576 (b)      | 28      | 61                        | This work                   |
| <i>pnp.b</i>     | U-TTCTGGGAGCTGTAGCCCGTCA<br>D-GCTGGCGTCACATGGACACAAAA    | 510               | 510                      | 30      | 61                        | This work                   |
| <i>slc29a1.a</i> | U-AATGCCCGACAGACCCGTACAA<br>D-AGGTAAGTCCGAGGTGCTACCA     | 250               | 3817                     | 28      | 61                        | This work                   |
| <i>scl29a2</i>   | U-CAAGTACCGCTTGGTCGCTGTT<br>D-TAGGTCTGAGGAAGGAGATCAG     | 485               | 4555                     | 29      | 61                        | This work                   |
| <i>slc29a3</i>   | U-GGGCTTCATTGCCCTGGAACCTT<br>D-GACATGGCACCGATGGAACAGC    | 164 (a) / 168 (b) | 2988 (a) / 1975 (b)      | 28      | 61                        | This work                   |
| <i>slc28a2</i>   | U-CTATCCTGAGGTGGAAGAATCA<br>D-ATTCCGATAATTGCCTGTAGGC     | 362               | 1434                     | 30      | 61                        | This work                   |
| <i>slc28a3</i>   | U-GCTAGCAGCAAGGTCTTAAG<br>D-GCCTTCATATCTGTCCATGA         | 333               | 8043                     | 29      | 61                        | This work                   |
| <i>odc</i>       | U-GGAGCTGCAATTTGAGA<br>D-TCAGTTGCCAGTGTGGTC              | 131               | 220                      | 20      | 55                        | Bassez <i>et al.</i> , 1990 |
| <i>ef1a</i>      | U-CAGATTGGTGCTGGATATGC<br>D-CACTGCCTTGATGACTCCTA         | 270               | N. d.                    | 20      | 55                        | Mohun <i>et al.</i> , 1989  |

N.d.: not determined

Tocco A.<sup>1,2</sup>, Pinson B.<sup>3,4</sup> Thiébaud P.<sup>1,2</sup>, Thézé N.<sup>1,2</sup>,  
Massé K. <sup>1,2,\*</sup>. **Comparative genomic and  
expression analysis of the adenosine signalling  
pathway members in *Xenopus*.**

Purinergic Signalling (2014)

<sup>1</sup>University of Bordeaux, CIRID UMR 5164,  
F-33000, Bordeaux, France.

<sup>2</sup>CNRS, CIRID, UMR 5164, F-33000 Bordeaux,  
France

<sup>3</sup> Université de Bordeaux, IBGC UMR 5095 1,  
F-33077 Bordeaux, France

<sup>4</sup> CNRS, IBGC UMR 5095 1, F-33077 Bordeaux,  
France

\*corresponding author

[karine.masse@u-bordeaux.fr](mailto:karine.masse@u-bordeaux.fr)

**Table S3. Cloning strategy used to identify *Xenopus* adenosine pathway genes.**

| Gene              | <i>X.laevis</i>                 | <i>X.tropicalis</i>                       |
|-------------------|---------------------------------|-------------------------------------------|
| <i>cd73</i>       | Xenbase query (FL clone)        | Xenbase query (FL clone)                  |
| <i>alpl</i>       | Xenbase query (FL clone)        | Xenbase query (FL clone)                  |
| <i>alpi.1</i>     | Xenbase query (FL clone)        | Xenbase query (FL clone)                  |
| <i>alpi.2</i>     | Xenbase query (FL clone)        | Xenbase query (FL clone)                  |
| <i>acpt</i>       | Xenbase query (FL clone)        | Xenbase query (FL clone)                  |
| <i>acp2</i>       | Xenbase query (FL clone)        | Xenbase query (FL clone)                  |
| <i>acpp</i>       | BLAST search (genomic sequence) | Xenbase query (FL clone)                  |
| <i>adora 1.a</i>  | Xenbase query (FL clone)        | Xenbase query (FL clone)                  |
| <i>adora 1.b</i>  | BLAST search (genomic sequence) | BLAST search (genomic sequence) Not found |
| <i>adora 2a.a</i> | Xenbase query (FL clone)        | Xenbase query (FL clone)                  |
| <i>adora 2a.b</i> | BLAST search (genomic sequence) | BLAST search (genomic sequence) Not found |
| <i>adora 2b.a</i> | BLAST search (genomic sequence) | Xenbase query (FL clone)                  |
| <i>adora 2b.b</i> | BLAST search (genomic sequence) | BLAST search (genomic sequence) Not found |
| <i>adora 3.1</i>  | BLAST search (genomic sequence) | Xenbase query (FL clone)                  |
| <i>adora 3.2</i>  | BLAST search (genomic sequence) | Xenbase query (FL clone)                  |
| <i>adora 3.3</i>  | BLAST search (genomic sequence) | Xenbase query (FL clone)                  |
| <i>adk</i>        | Xenbase query (FL clone)        | Xenbase query (FL clone)                  |
| <i>ada.1a</i>     | Xenbase query (FL clone)        | Xenbase query (FL clone)                  |
| <i>ada.1b</i>     | BLAST search (genomic sequence) | BLAST search (genomic sequence) Not found |
| <i>ada.2</i>      | Xenbase query (FL clone)        | Xenbase query (FL clone)                  |
| <i>pnp.a</i>      | BLAST search (genomic sequence) | Xenbase query (FL clone)                  |
| <i>pnp.b</i>      | Xenbase query (FL clone)        | BLAST search (genomic sequence) Not found |
| <i>slc29a1.a</i>  | Xenbase query (FL clone)        | Xenbase query (FL clone)                  |
| <i>slc29a1.b</i>  | Xenbase query (FL clone)        | BLAST search (genomic sequence) Not found |
| <i>slc29a2</i>    | Xenbase query (FL clone)        | Xenbase query (FL clone)                  |
| <i>slc29a3.a</i>  | Xenbase query (FL clone)        | Xenbase query (FL clone)                  |
| <i>slc29a3.b</i>  | BLAST search (genomic sequence) | BLAST search (genomic sequence) Not found |
| <i>slc28a2</i>    | Xenbase query (FL clone)        | Xenbase query (FL clone)                  |
| <i>slc28a3</i>    | BLAST search (genomic sequence) | Xenbase query (FL clone)                  |

: Full Length

Tocco A.<sup>1,2</sup>, Pinson B.<sup>3,4</sup> Thiébaud P.<sup>1,2</sup>, Thézé N.<sup>1,2</sup>, Massé K.<sup>1,2,\*</sup>. Comparative genomic and expression analysis of the adenosine signalling pathway members in *Xenopus*.

Purinergic Signalling (2014)

<sup>1</sup>University of Bordeaux, CIRID UMR 5164, F-33000, Bordeaux, France.

<sup>2</sup>CNRS, CIRID, UMR 5164, F-33000 Bordeaux, France

<sup>3</sup> Université de Bordeaux, IBGC UMR 5095 1, F-33077 Bordeaux, France

<sup>4</sup> CNRS, IBGC UMR 5095 1, F-33077 Bordeaux, France

\* corresponding author [karine.masse@u-bordeaux.fr](mailto:karine.masse@u-bordeaux.fr)

**Table S4. Identity conservation between *Xenopus* acid phosphatase proteins and their human orthologs.**

|      |        | ACPT |      |      | ACPP |      |        |        | ACP2 |      |        |        |
|------|--------|------|------|------|------|------|--------|--------|------|------|--------|--------|
|      |        | X.l  | X.t  | H.s  | X.l  | X.t  | .1 H.s | .2 H.s | X.l  | X.t  | .1 H.s | .2 H.s |
| ACPT | X.l    | 100  |      |      |      |      |        |        |      |      |        |        |
|      | X.t    | 88.3 | 100  |      |      |      |        |        |      |      |        |        |
|      | H.s    | 45.2 | 46.1 | 100  |      |      |        |        |      |      |        |        |
| ACPP | X.l    | 41.1 | 42.8 | 36.1 | 100  |      |        |        |      |      |        |        |
|      | X.t    | 39.6 | 40.8 | 36.8 | 81.0 | 100  |        |        |      |      |        |        |
|      | .1 H.s | 42.1 | 41.4 | 39.0 | 51.0 | 48.1 | 100    |        |      |      |        |        |
|      | .2 H.s | 44.6 | 44.0 | 41.2 | 49.5 | 49.7 | 98.2   | 100    |      |      |        |        |
| ACP2 | X.l    | 44.5 | 44.7 | 39.2 | 42.8 | 43.2 | 46.2   | 49.5   | 100  |      |        |        |
|      | X.t    | 41.7 | 41.6 | 40.1 | 41.8 | 41.5 | 45.5   | 48.5   | 76.6 | 100  |        |        |
|      | .1 H.s | 43.8 | 45.1 | 41.4 | 46.3 | 45.1 | 45.5   | 47.4   | 58.6 | 58.9 | 100    |        |
|      | .2 H.s | 46.9 | 47.5 | 46.9 | 51.3 | 48.8 | 49.4   | 49.4   | 56.9 | 58.8 | 93.8   | 100    |

Tocco A.<sup>1,2</sup>, Pinson B.<sup>3,4</sup> Thiébaud P.<sup>1,2</sup>, Thézé N.<sup>1,2</sup>, Massé K.<sup>1,2,\*</sup>. **Comparative genomic and expression analysis of the adenosine signalling pathway members in *Xenopus*.** Purinergic Signalling (2014)

<sup>1</sup>University of Bordeaux, CIRID UMR 5164, F-33000, Bordeaux, France.

<sup>2</sup>CNRS, CIRID, UMR 5164, F-33000 Bordeaux, France

<sup>3</sup> Université de Bordeaux, IBGC UMR 5095 1, F-33077 Bordeaux, France

<sup>4</sup> CNRS, IBGC UMR 5095 1, F-33077 Bordeaux, France

\* corresponding author [karine.masse@u-bordeaux.fr](mailto:karine.masse@u-bordeaux.fr)

**Table S5. Identity conservation between *Xenopus ada* proteins and their human orthologs.**

|     |        | X.l    |        |       | X.t   |       | H.s |
|-----|--------|--------|--------|-------|-------|-------|-----|
|     |        | ADA.1a | ADA.1b | ADA.2 | ADA.1 | ADA.2 |     |
| X.l | ADA.1a | 100    |        |       |       |       |     |
|     | ADA.1b | 94.4   | 100    |       |       |       |     |
|     | ADA.2  | 66.2   | 65.4   | 100   |       |       |     |
| X.t | ADA.1  | 95.8   | 94.1   | 67.9  | 100   |       |     |
|     | ADA.2  | 67.7   | 68.0   | 91.0  | 68.3  | 100   |     |
| H.s |        | 69.0   | 68.0   | 57.8  | 70.4  | 59.3  | 100 |

Tocco A.<sup>1,2</sup>, Pinson B.<sup>3,4</sup> Thiébaud P.<sup>1,2</sup>, Thézé N.<sup>1,2</sup>, Massé K.<sup>1,2,\*</sup>. **Comparative genomic and expression analysis of the adenosine signalling pathway members in *Xenopus*.** Purinergic Signalling (2014)

<sup>1</sup>University of Bordeaux, CIRID UMR 5164, F-33000, Bordeaux, France.

<sup>2</sup>CNRS, CIRID, UMR 5164, F-33000 Bordeaux, France

<sup>3</sup> Université de Bordeaux, IBGC UMR 5095 1, F-33077 Bordeaux, France

<sup>4</sup> CNRS, IBGC UMR 5095 1, F-33077 Bordeaux, France

\* corresponding author [karine.masse@u-bordeaux.fr](mailto:karine.masse@u-bordeaux.fr)

**Table S6. Identity conservation between *Xenopus* pnp proteins and their human orthologues.**

|                  | <b>PNP.a X.l</b> | <b>PNP.b X.l</b> | <b>PNP X.t</b> | <b>PNP H.s</b> |
|------------------|------------------|------------------|----------------|----------------|
| <b>PNP.a X.l</b> | 100              |                  |                |                |
| <b>PNP.b X.l</b> | 89.9             | 100              |                |                |
| <b>PNP X.t</b>   | 86.8             | 89.9             | 100            |                |
| <b>PNP H.s</b>   | 65.5             | 63.3             | 64.7           | 100            |

Tocco A.<sup>1,2</sup>, Pinson B.<sup>3,4</sup> Thiébaud P.<sup>1,2</sup>, Thézé N.<sup>1,2</sup>, Massé K.<sup>1,2,\*</sup>. **Comparative genomic and expression analysis of the adenosine signalling pathway members in *Xenopus*.** Purinergic Signalling (2014)

<sup>1</sup>University of Bordeaux, CIRID UMR 5164, F-33000, Bordeaux, France.

<sup>2</sup>CNRS, CIRID, UMR 5164, F-33000 Bordeaux, France

<sup>3</sup> Université de Bordeaux, IBGC UMR 5095 1, F-33077 Bordeaux, France

<sup>4</sup> CNRS, IBGC UMR 5095 1, F-33077 Bordeaux, France

\* corresponding author [karine.masse@u-bordeaux.fr](mailto:karine.masse@u-bordeaux.fr)



**Table S7. Identity conservation between *Xenopus* SLC29A proteins and their human orthologs.**

|     |           | X.l       |           |         |           |           | X.t     |         |         | H.s     |         |          |          |         |
|-----|-----------|-----------|-----------|---------|-----------|-----------|---------|---------|---------|---------|---------|----------|----------|---------|
|     |           | SLC29A1.a | SLC29A1.b | SLC29A2 | SLC29A3.a | SLC29A3.b | SLC29A1 | SLC29A2 | SLC29A3 | SLC29A1 | SLC29A2 | SLC29A3a | SLC29A3b | SLC29A4 |
| X.l | SLC29A1.a | 100       |           |         |           |           |         |         |         |         |         |          |          |         |
|     | SLC29A1.b | 91.8      | 100       |         |           |           |         |         |         |         |         |          |          |         |
|     | SLC29A2   | 45.5      | 44.4      | 100     |           |           |         |         |         |         |         |          |          |         |
|     | SLC29A3.a | 32.0      | 33.3      | 31.0    | 100       |           |         |         |         |         |         |          |          |         |
|     | SLC29A3.b | 31.2      | 32.2      | 30.3    | 89.7      | 100       |         |         |         |         |         |          |          |         |
| X.t | SLC29A1   | 88.4      | 90.2      | 46.6    | 33.6      | 32.8      | 100     |         |         |         |         |          |          |         |
|     | SLC29A2   | 47.8      | 47.5      | 89.3    | 32.1      | 31.0      | 47.9    | 100     |         |         |         |          |          |         |
|     | SLC29A3   | 24.5      | 24.5      | 27.9    | 85.1      | 83.6      | 25.0    | 26.4    | 100     |         |         |          |          |         |
| H.s | SLC29A1   | 61.2      | 61.4      | 44.9    | 34.9      | 34.4      | 61.1    | 46.9    | 29.3    | 100     |         |          |          |         |
|     | SLC29A2   | 47.8      | 47.9      | 59.2    | 32.7      | 32.2      | 48.6    | 60.1    | 29.3    | 46.7    | 100     |          |          |         |
|     | SLC29A3a  | 29.9      | 30.5      | 25.5    | 52.4      | 51.4      | 30.4    | 26.2    | 22.2    | 30.2    | 29.1    | 100      |          |         |
|     | SLC29A3b  | 13.7      | 14.4      | 14.4    | 25.5      | 28.1      | 13.9    | 14.9    | 33.5    | 14.1    | 15.9    | 54.3     | 100      |         |
|     | SLC29A4   | 21.4      | 21.3      | 21.2    | 20.5      | 19.2      | 22.9    | 22.9    | 15.4    | 21.1    | 23.3    | 23.1     | 11.9     | 100     |

Tocco A.<sup>1,2</sup>, Pinson B.<sup>3,4</sup> Thiébaud P.<sup>1,2</sup>, Thézé N.<sup>1,2</sup>, Massé K.<sup>1,2,\*</sup>. **Comparative genomic and expression analysis of the adenosine signalling pathway members in *Xenopus*.**

Purinergic Signalling (2014)

<sup>1</sup>University of Bordeaux, CIRID UMR 5164, F-33000, Bordeaux, France.

<sup>2</sup>CNRS, CIRID, UMR 5164, F-33000 Bordeaux, France

<sup>3</sup> Université de Bordeaux, IBGC UMR 5095 1, F-33077 Bordeaux, France

<sup>4</sup> CNRS, IBGC UMR 5095 1, F-33077 Bordeaux, France

\* corresponding author [karine.masse@u-bordeaux.fr](mailto:karine.masse@u-bordeaux.fr)

**Table S8. Identity conservation between *Xenopus* SLC28A proteins and their human orthologs.**

|     |                | X.l     |         | X.t     |         | H.s     |         |         |
|-----|----------------|---------|---------|---------|---------|---------|---------|---------|
|     |                | SLC28A2 | SLC28A3 | SLC28A2 | SLC28A3 | SLC28A1 | SLC28A2 | SLC28A3 |
| X.l | <b>SLC28A2</b> | 100     |         |         |         |         |         |         |
|     | <b>SLC28A3</b> | 45.0    | 100     |         |         |         |         |         |
| X.t | <b>SLC28A2</b> | 90.9    | 45.4    | 100     |         |         |         |         |
|     | <b>SLC28A3</b> | 48.7    | 91.1    | 49.8    | 100     |         |         |         |
| H.s | <b>SLC28A1</b> | 58.0    | 40.5    | 56.1    | 42.7    | 100     |         |         |
|     | <b>SLC28A2</b> | 56.6    | 41.0    | 56.1    | 43.0    | 63.0    | 100     |         |
|     | <b>SLC28A3</b> | 46.4    | 62.0    | 44.8    | 63.4    | 42.1    | 40.9    | 100     |

Tocco A.<sup>1,2</sup>, Pinson B.<sup>3,4</sup> Thiébaud P.<sup>1,2</sup>, Thézé N.<sup>1,2</sup>, Massé K.<sup>1,2,\*</sup>. **Comparative genomic and expression analysis of the adenosine signalling pathway members in *Xenopus*.** Purinergic Signalling (2014)

<sup>1</sup>University of Bordeaux, CIRID UMR 5164, F-33000, Bordeaux, France.

<sup>2</sup>CNRS, CIRID, UMR 5164, F-33000 Bordeaux, France

<sup>3</sup> Université de Bordeaux, IBGC UMR 5095 1, F-33077 Bordeaux, France

<sup>4</sup> CNRS, IBGC UMR 5095 1, F-33077 Bordeaux, France

\* corresponding author [karine.masse@u-bordeaux.fr](mailto:karine.masse@u-bordeaux.fr)
